# Supplementary material
Source: Springer Nature journal article supplement (https://www.springermedizin.de/resource/supplementary/12911_2009_304_MOESM14_ESM.pdf/9525492)
Supplement: MOESM14 [file 9525492]

```

<Model composite="false" considerDefaultProperties="false" displayModelType="Action" id="ID16"
modelType="ActivityAction" name="Add Morphine 1m/h;Add Dormicum 2m/h">
  <ModelProperties>
    <StringProperty displayName="Name" name="name" value="Add Morphine 1m/h;Add Dormicum 2m/h"/>
    <StringProperty displayName="Model Type" name="modelType" value="ActivityAction"/>
    <BooleanProperty displayName="Must Isolate" name="mustIsolate" value="false"/>
    <BooleanProperty displayName="Leaf" name="leaf" value="false"/>
    <StringProperty displayName="Visibility" name="visibility" value="Unspecified"/>
    <ModelRefsProperty displayName="Stereotypes" name="stereotypes"/>
    <ModelProperty displayName="Tagged Values" name="taggedValues"/>
    <ModelsProperty displayName="Comments" name="comments"/>
    <HTMLProperty displayName="Documentation" name="documentation" plainTextValue=""/>
    <ModelsProperty displayName="Voices" name="voices"/>
    <ModelsProperty displayName="References" name="references"/>
    <StringProperty displayName="Transit From" name="transitFrom"/>
    <StringProperty displayName="Transit To" name="transitTo"/>
    <ModelProperty displayName="Action Type" name="actionType"/>
    <ModelsProperty displayName="Parameter Sets" name="parameterSets"/>
    <StringProperty displayName="Effect" name="effect"/>
    <DiagramElementRefProperty displayName="Master View" name="masterView">
      <DiagramElementRef displayShapeType="Activity Action" id="ID22" model="ID16"
name="Add Morphine 1m/h;Add Dormicum 2m/h" shapeType="ActivityAction"/>
    </DiagramElementRefProperty>
  </ModelProperties>
  <FromSimpleRelationships>
    <RelationshipRef from="O6ideySE6wWsNyF0" id="j4rdeySE6wWsNyUK" to="mpNdeySE6wWsNyOa"/>
  </FromSimpleRelationships>
  <ToSimpleRelationships>
    <RelationshipRef from="pYdleySE6wWsNxc_" id="H75deySE6wWsNyOS" to="O6ideySE6wWsNyF0"/>
  </ToSimpleRelationships>
</Model>

```

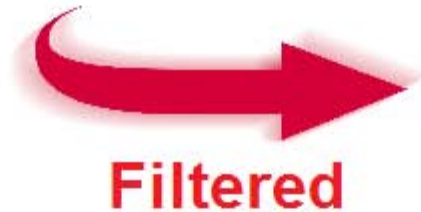

```

<Model id="ID16" modelType="ActivityAction" name="Add Morphine 1m/h;Add Dormicum 2m/h">
  <FromSimpleRelationships>
    <RelationshipRef from="ID16" id="rel11" to="ID11"/>
  </FromSimpleRelationships>
  <ToSimpleRelationships>
    <RelationshipRef from="ID8" id="rel12" to="ID16"/>
  </ToSimpleRelationships>
</Model>

```
